# Supplementary material
Source: publisher figshare collection journal article supplement (https://frontiersin.figshare.com/ndownloader/files/22640801)
Supplement: Supplementary file [file 22640801]

**A**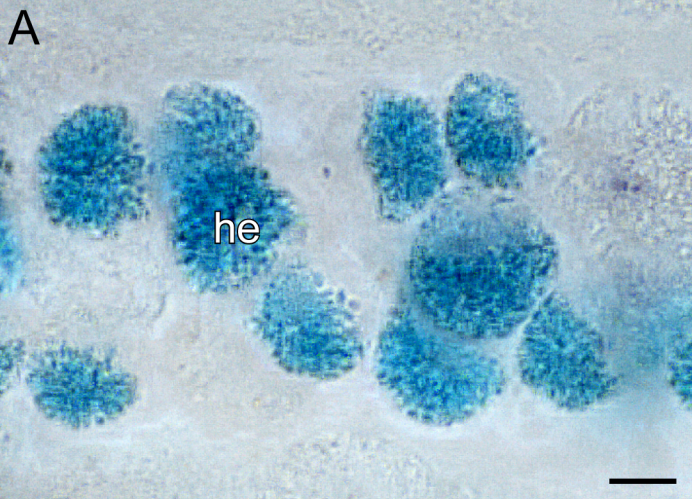**B**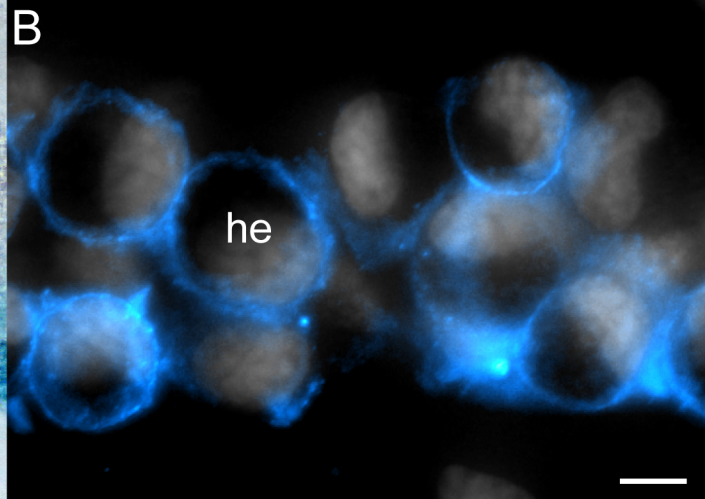

**Supplementary Figure 7** Immunolocalization of Er-PDFR in hemocytes of *E. rowelli*. **(A)** Transmitted light and **(B)** fluorescence light micrographs of the same region. Er-PDFR (cyan) and DNA (grey). **(A)** Blue granulated pigments occur in a subset of hemocytes in heart lumen. **(B)** PDFR immunoreactivity in membrane of same hemocytes. he, hemocyte. Scale bars: 5  $\mu\text{m}$ .
